# Supplementary material for: Mediastinal Lymphadenectomy Strategy for Siewert II Adenocarcinoma of the Esophagogastric Junction: A Retrospective Cohort Study
Source: Research Square preprint supplement (doi:10.21203/rs.3.rs-7635196/v1), 2025-10-03
Supplement: Supplementary file 1 [file 08f478e27a8f1a0c454aecf9.docx]

| Complication Type | CMAD Group (n=70) | MLMAD Group (n=70) | P |
| --- | --- | --- | --- |
| Overall Complications | 56 (80.0%) | 54 (77.1%) | 0.84 |
| Anastomotic Leak | 4 (5.7%) | 2 (2.9%) | 0.68 |
| Pneumonia | 13 (18.6%) | 13 (18.6%) | >0.999 |
| RLNP | 7 (10.0%) | 5 (7.1%) | 0.76 |
| Chylothorax | 0 (0%) | 0 (0%) | >0.999 |
| Cardiac Arrhythmia | 1 (1.4%) | 2 (2.9%) | >0.999 |
| Wound Infection | 11 (15.7%) | 9 (12.9%) | 0.81 |
| Pleural effusion | 18 (25.7%) | 22 (31.4%) | 0.57 |
| Gastric emptying disorder | 4(5.7%) | 3(4.3%) | >0.999 |
| Respiratory failure | 1 (1.4%) | 0 (0%) | >0.999 |
| Hypoproteinemia | 19(27.1%) | 22(31.4%) | 0.71 |
| 90‐day postoperative mortality | 3(4.3%) | 3(4.3%) | >0.999 |
| Clavien‐Dindo grade  (I-II) | 47(67.1%) | 43(61.4%) | 0.53 |
| Clavien‐Dindo grade  (III-V) | 9(12.9%) | 11(15.7%) | 0.81 |

**Supplementary Table 1**: Postoperative Complications Classified by Clavien-Dindo Grade after propensity score-matched

RLNP:Recurrent Laryngeal Nerve Palsy; CMAD:complete mediastinum and abdominal lymph node disscton; MLMAD:middle and lower mediastinum and abdominal lymph node disscton
